# Supplementary figures and images for: Dynamic deformability of Plasmodium falciparum-infected erythrocytes exposed to artesunate in vitro.
Source: Royal Society of Chemistry journal article supplement (doi:10.1039/c2ib20161e), 2013-02-01

S1

A

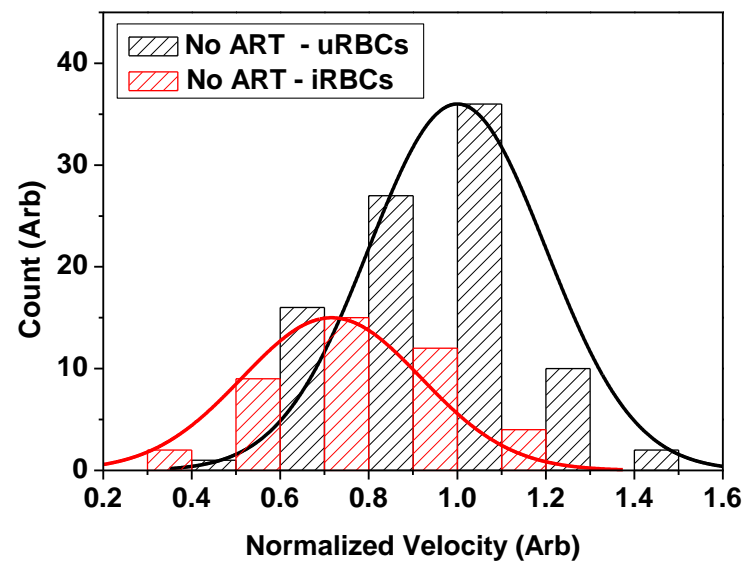

B

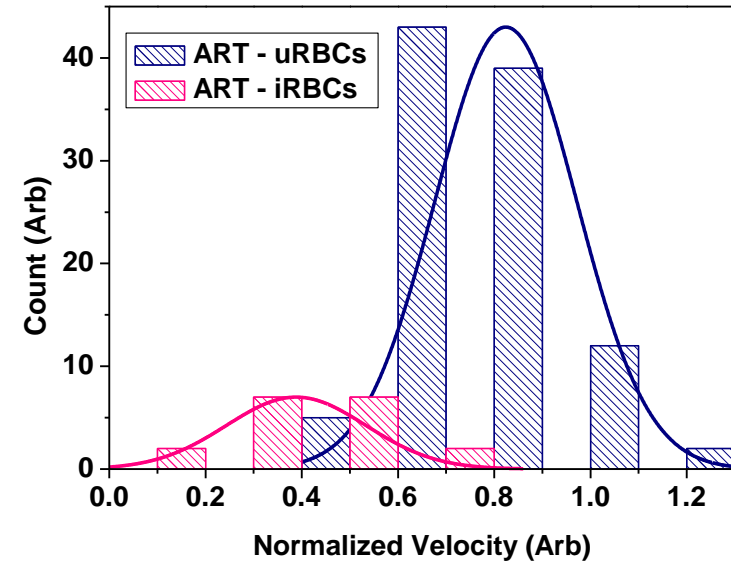

C

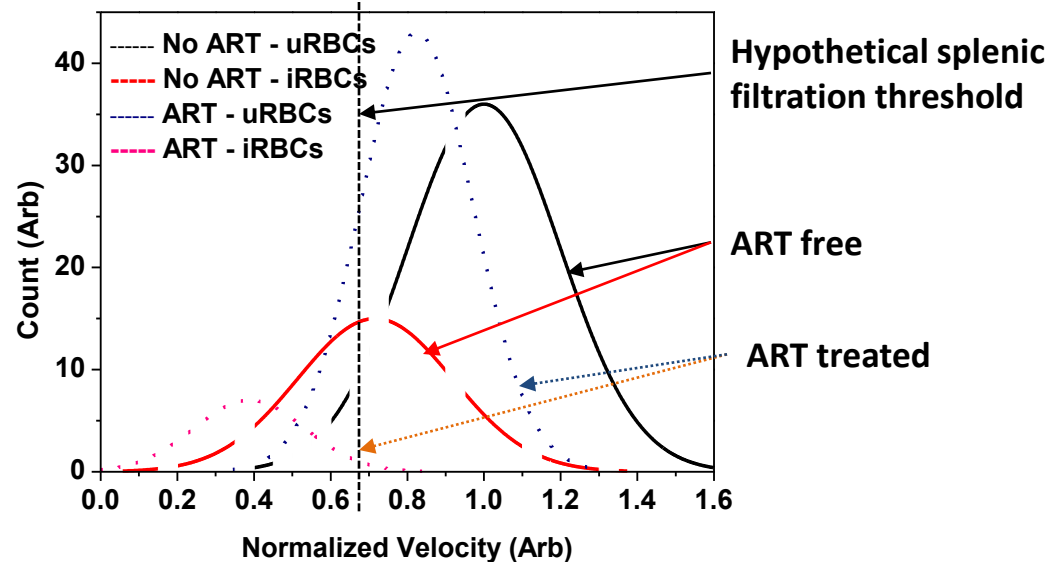

Supplement: c2ib20161e_3.pdf [file c2ib20161e_3.pdf]

# S2

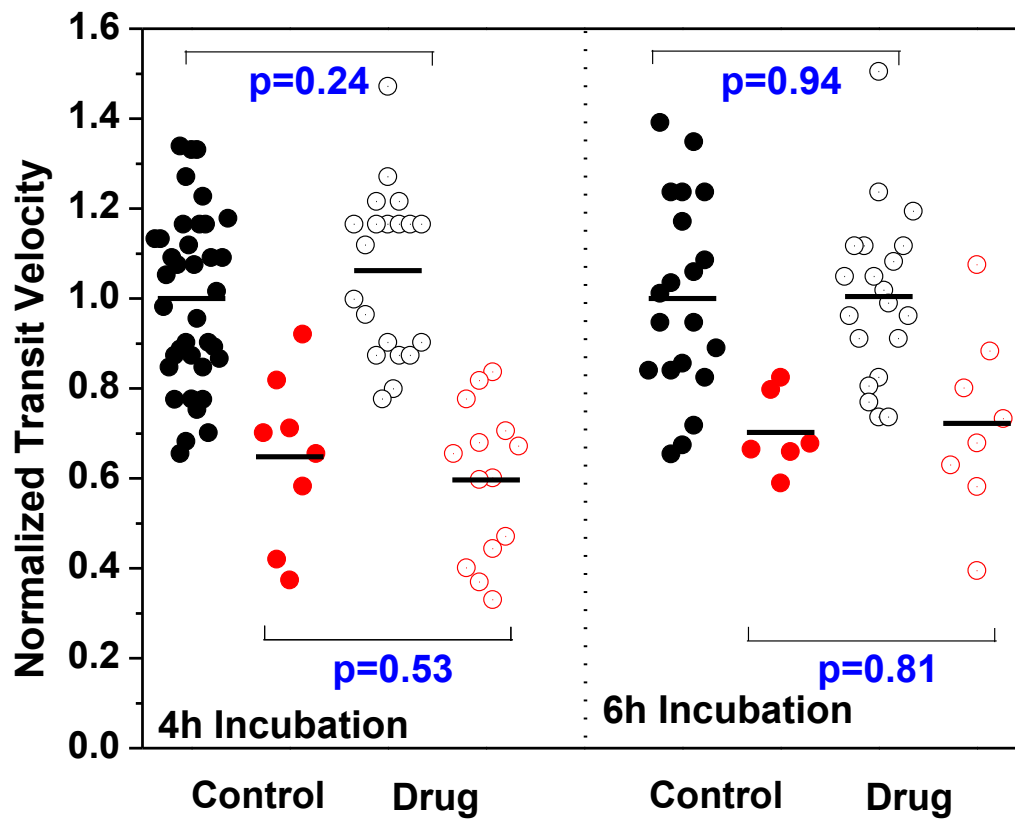

Supplement: c2ib20161e_4.pdf [file c2ib20161e_4.pdf]

# S3

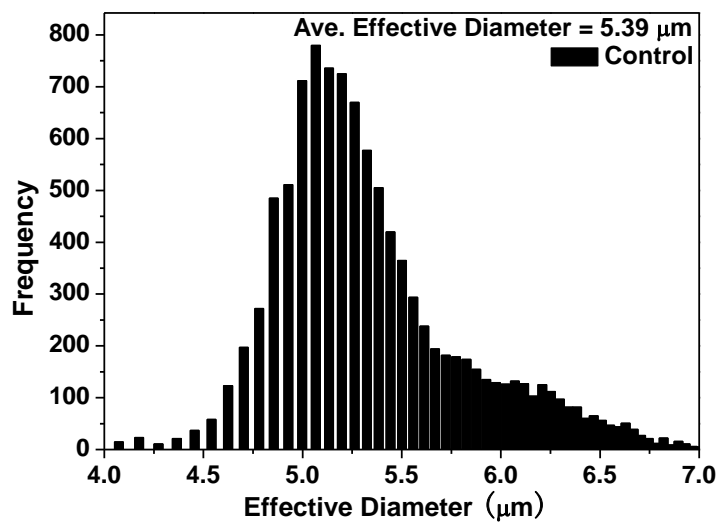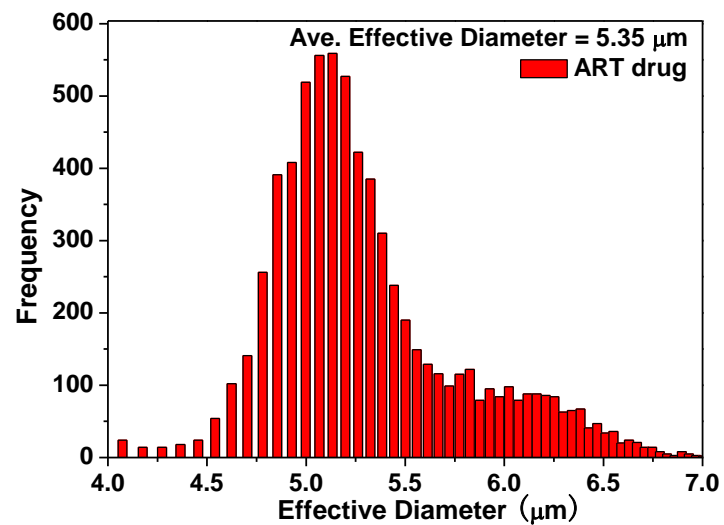

Supplement: c2ib20161e_5.pdf [file c2ib20161e_5.pdf]
